# Supplementary material
Source: MDPI journal article supplement (https://www.mdpi.com/2504-4494/6/3/63)
Supplement: s1 [file s1]

EBSD-Schichtbild 2

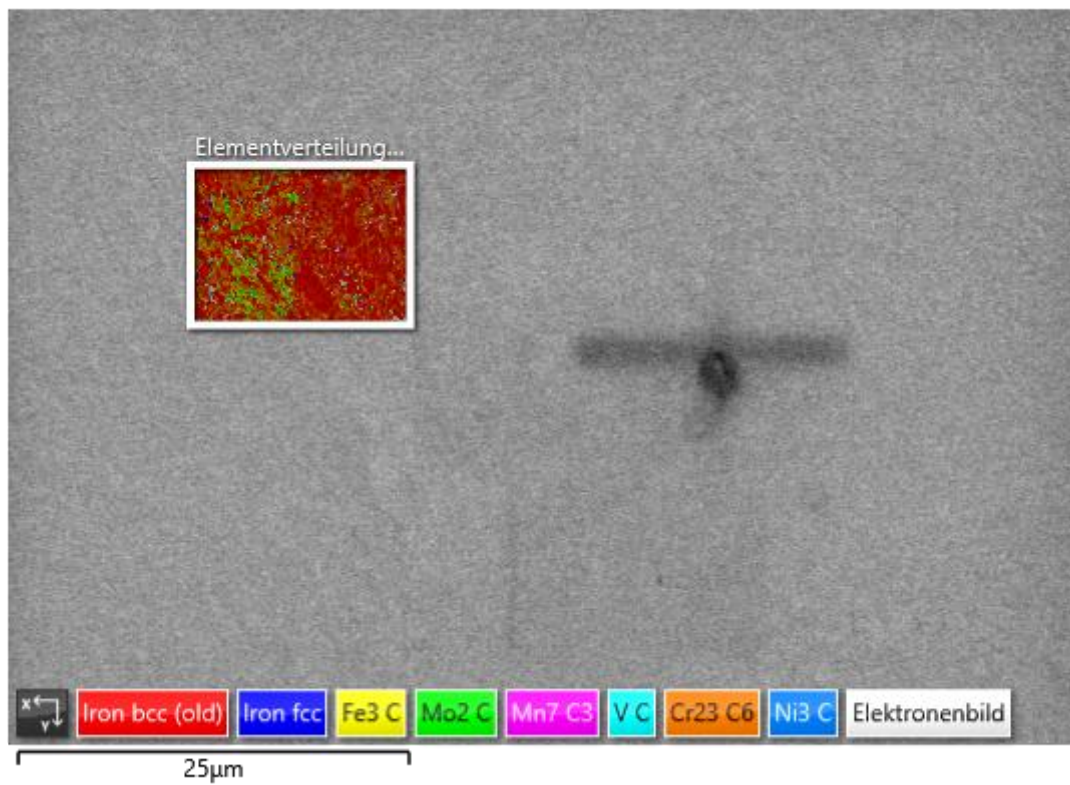

Phasenfarbe 2

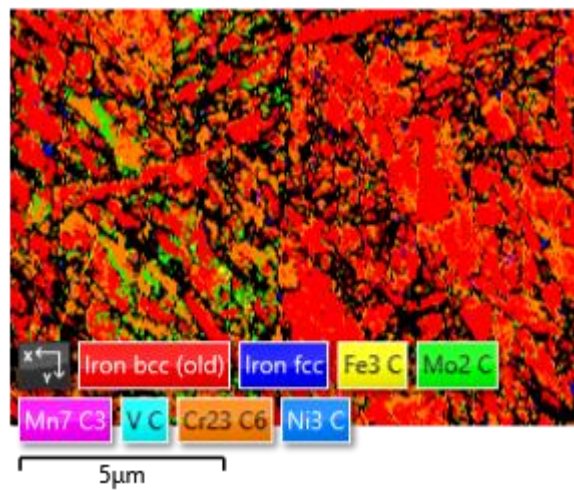

**Modified 1.2343 as-built** – 30 µm layer thickness (a) Martensite, retained austenite (Ra), Mo<sub>2</sub>C. Small amounts of identifiable Fe<sub>3</sub>C, Cr<sub>23</sub>C<sub>6</sub>, Mn<sub>7</sub>C<sub>3</sub>, VC
