# Supplementary material
Source: MDPI journal article supplement (https://www.mdpi.com/2504-4494/6/3/63)

EBSD-Schichtbild 2

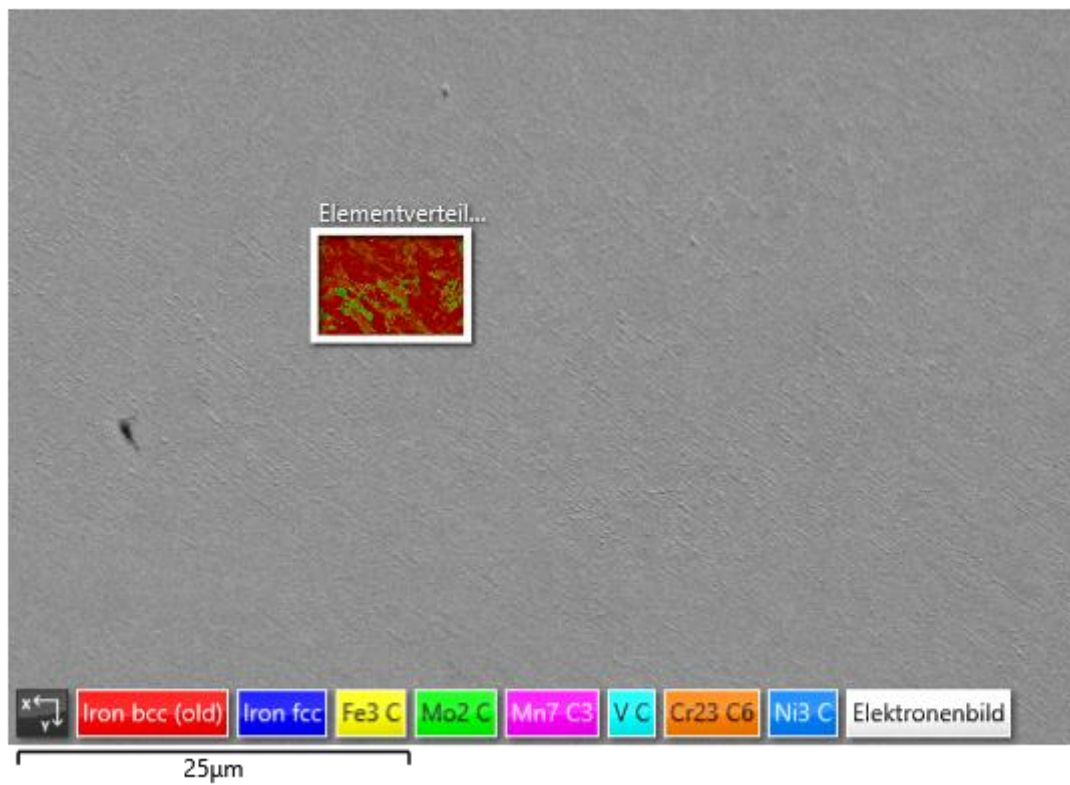

Phasenfarbe 2

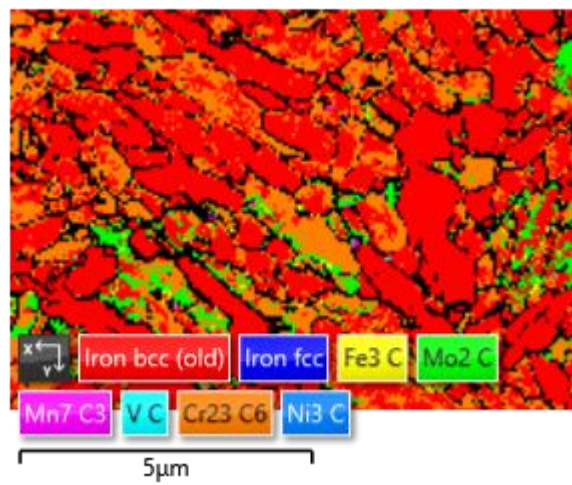

Modified steel as-built – 30µm layer thickness : tempered at 550 °C for 4hrs.

Supplement: s1 [file s1]

EBSD Layered Image 5

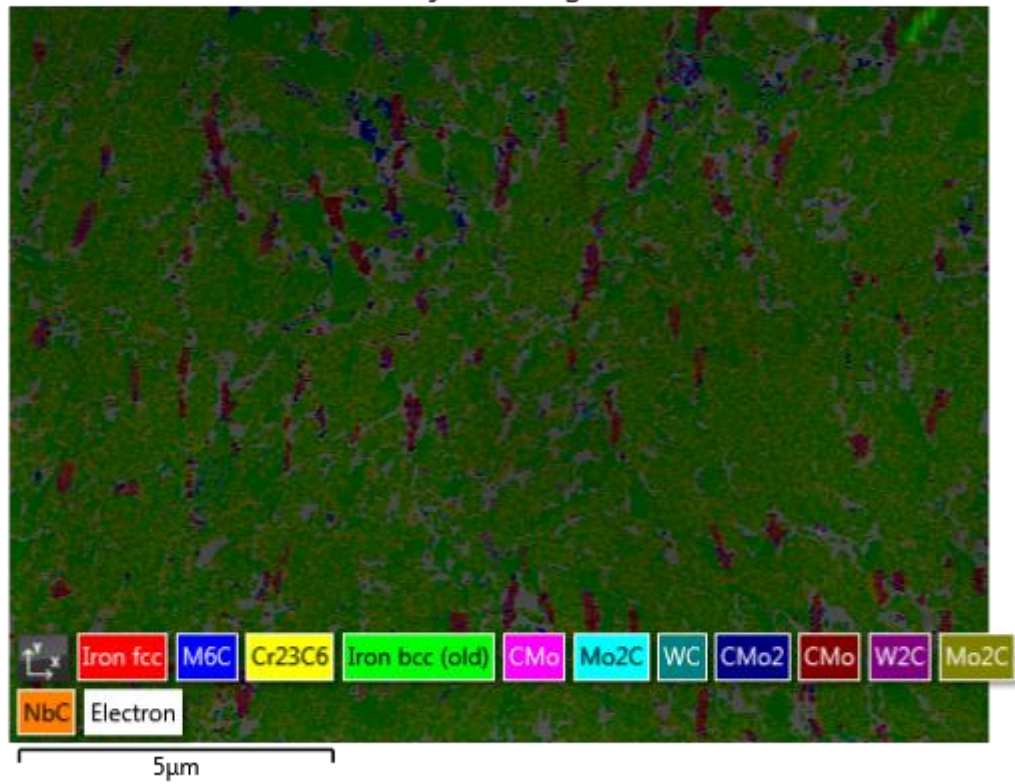

Band Contrast 5

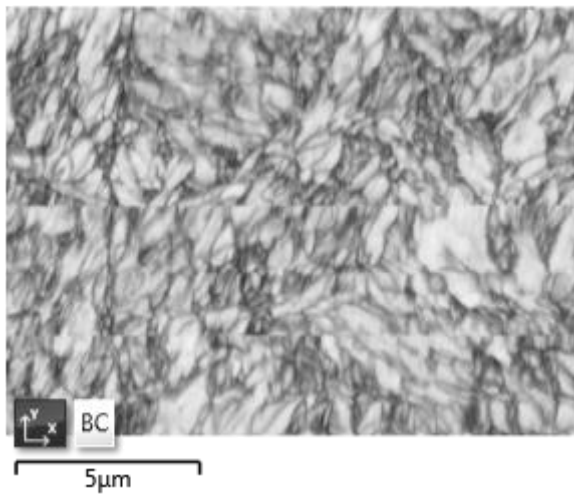

Phase Color 5

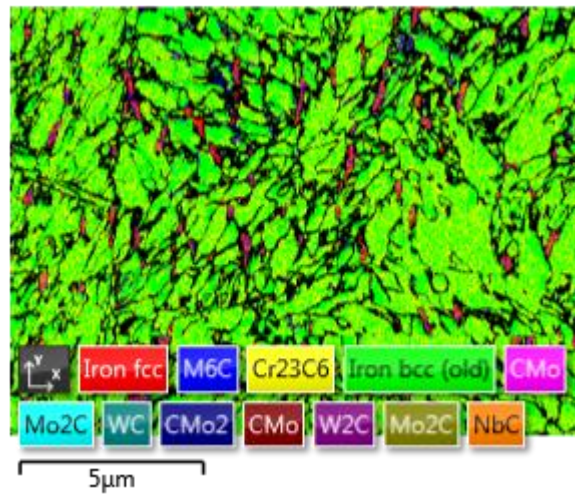

Standard 1.2343 Pre-heat Treatment (500°C): 30 µm layer thickness

Supplement: s1 [file s1]

EBSD Layered Image 8

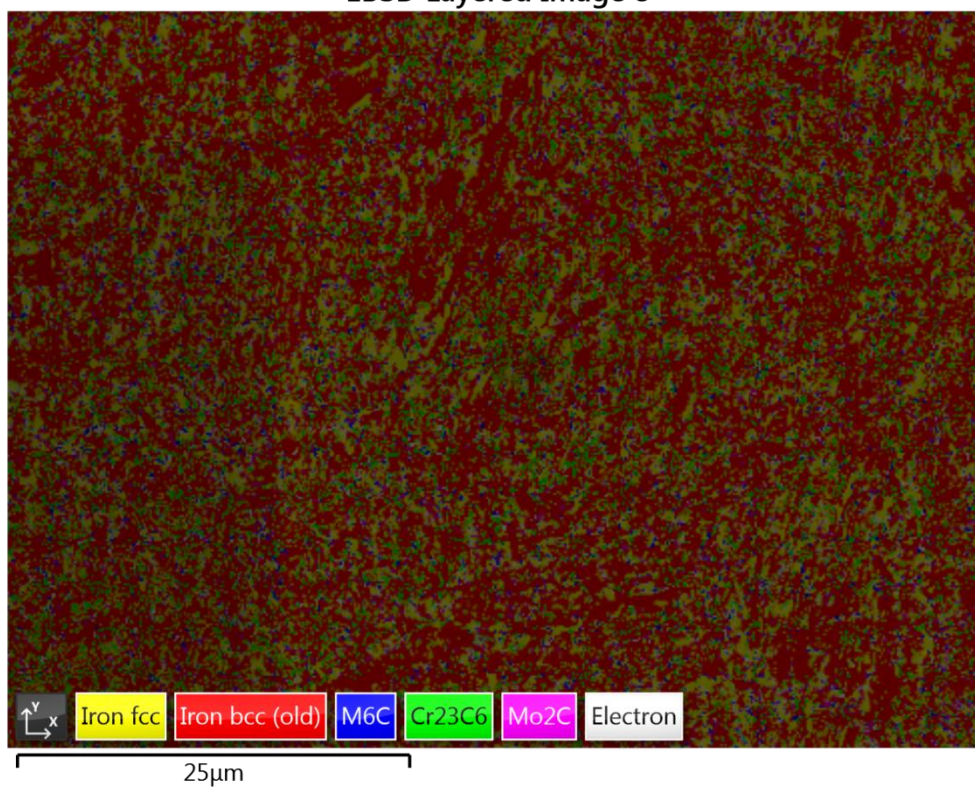

Phase Color 8

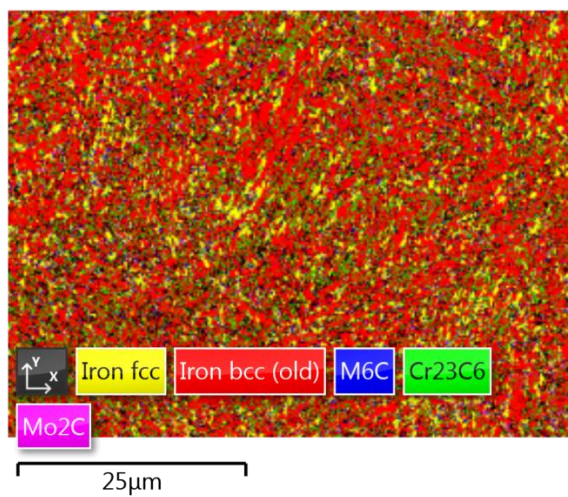

**Standard 1.2343 As-Built** - 30 µm layer thickness

Supplement: s1 [file s1]
